# Supplementary material for: Radiating pain: venom has contributed to the diversification of the largest radiations of vertebrate and invertebrate animals
Source: PubMed Central journal article supplement (PMC8336261; doi:10.1186/s12862-021-01880-z), 2021-08-03

- Gain of venom
- No gain of venom

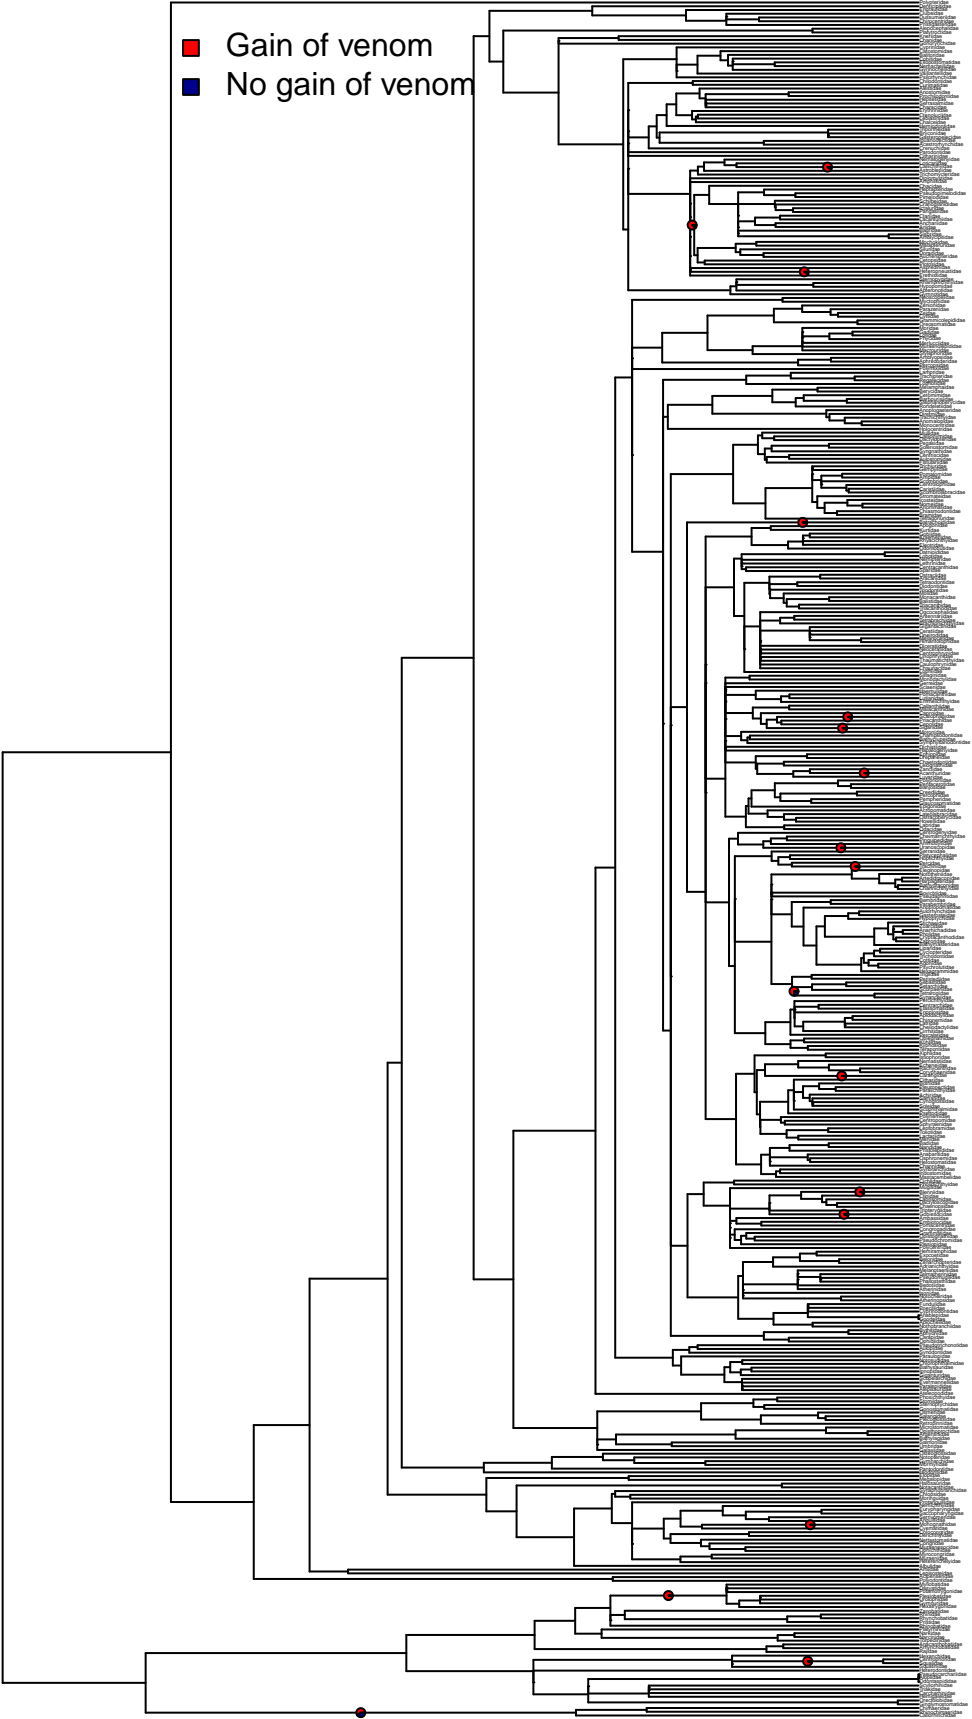

Supplement: 12862_2021_1880_MOESM2_ESM.pdf [file 12862_2021_1880_MOESM2_ESM.pdf]
